# Supplementary material for: Cardiopulmonary Ultrasound Patterns of Transient Acute Respiratory Distress of the Newborn: A Retrospective Pilot Study
Source: MDPI journal article supplement (doi:10.3390/children10020289), 2023-02-02
Supplement: s1 [file s1]

Article

# Cardiopulmonary ultrasound patterns of transient acute respiratory distress of the newborn: a retrospective pilot study

Maria Pierro <sup>1,\*</sup>, Roberto Chioma <sup>2</sup>, Consuelo Benincasa <sup>1,3</sup>, Giacomo Gagliardi <sup>1,3</sup>, Lorenzo Amabili <sup>4</sup>, Francesca Lelli <sup>1,3</sup>, Patrizio Antonazzo <sup>5</sup>, Giovanni De Luca <sup>6</sup> and Enrico Storti <sup>7</sup>

<sup>1</sup> Neonatal and Paediatric Intensive Care Unit, M. Bufalini Hospital, AUSL Romagna, Cesena, Italy;

<sup>2</sup> Neonatal Intensive Care Unit, Catholic University of Sacred Heart, Rome, Italy.

<sup>3</sup> Paediatric Unit, Ferrara University Hospital, Ferrara, Italy;

<sup>4</sup> Mosaic factor, Barcelona, Spain

<sup>5</sup> Unit of Obstetrics and Gynecology, Bufalini Hospital-AUSL Romagna, Cesena, Italy

<sup>6</sup> Pathology and Oncohematology department, M. Bufalini Hospital, AUSL Romagna, Cesena, Italy

<sup>7</sup> Department of Critical Care, Maggiore Hospital, Cremona, Italy.

\* Correspondence: Maria Pierro; [maria.pierro93gmail.com](mailto:maria.pierro93gmail.com); [maria.pierro@auslromagna.it](mailto:maria.pierro@auslromagna.it); Neonatal and Paediatric Intensive Care Unit, M. Bufalini Hospital, AUSL Romagna, Viale G. Ghirotti, 286 - 47521, Cesena, Italy; Phone number: +39/0547352844

\*Correspondence: Maria Pierro  
[maria.pierro93gmail.com](mailto:maria.pierro93gmail.com); [maria.pierro@auslromagna.it](mailto:maria.pierro@auslromagna.it)  
Neonatal and Paediatric Intensive Care Unit  
M. Bufalini Hospital, AUSL Romagna  
Viale G. Ghirotti, 286 - 47521, Cesena, Italy  
Phone number: +39/0547352844

## SUPPLEMENTAL MATERIAL

### MATERIAL AND METHODS

**Definitions of the prenatal collected data are as follows:**

- diabetes in pregnancy as defined by NICE guidelines in presence of a fasting plasma glucose level of 5.6 mmol/liter or above or a 2-hour plasma glucose level of 7.8 mmol/liter or above [1], or preexisting diabetes [2]. Type of diabetes was recorded
- Gestational disorders of pregnancy were defined according to the American College of Obstetricians and Gynecologists (ACOG) guidelines [3]: preexisting or gestational hypertension, defined by the new onset of hypertension (systolic blood pressure  $\geq 140$  mmHg and/or diastolic blood pressure  $\geq 90$  mmHg) at  $\geq 20$  weeks of gestation in the absence of proteinuria or new signs of end-organ dysfunction, preeclampsia refers to the new onset of hypertension and proteinuria or the new onset of hypertension and significant end-organ dysfunction with or without proteinuria after 20 weeks of gestation or postpartum in a previously normotensive patient, HELLP syndrome (hemolysis with a microangiopathic blood smear, elevated liver enzymes, and a low platelet count); chronic hypertension (systolic blood pressure  $\geq 140$  mmHg and/or diastolic blood pressure  $\geq 90$  mmHg) before 20 weeks gestation
- “Intrauterine Inflammation or Infection or both” also known as “Triple-I syndrome” was defined as the presence of intrapartum fever with at least one of the following items: fetal tachycardia ( $> 160$  bpm for more than 10 minutes), maternal WBC  $> 15,000$  in absence of corticosteroid treatment, purulent fluid from the cervical canal and biochemical or microbiologic amniotic fluid results consistent with microbial invasion of the amniotic cavity. Instead, a clinically documented fever with a temperature measured orally higher than  $39.0^{\circ}\text{C}$  or  $102.2^{\circ}\text{F}$  once or  $38.0^{\circ}\text{C}$  or  $100.4^{\circ}\text{F}$  twice was defined as isolated maternal fever [4].
- Intrauterine growth restriction (IUGR) was defined as a weight below the 10th percentile at fetal ultrasound [5].
- Fetal heart monitoring: intrapartum fetal heart health monitoring with non-invasive electronic monitoring classified in three categories: category 1 (normal) when fetal heart rate (FHR) baseline is between 110 and 160 bpm with moderate FHR variability (6 to 25 bpm) and absence of late, variable, or prolonged FHR decelerations; category 3 (pathological) if there are sinusoidal pattern, absent baseline FHR variability or recurrent late decelerations, recurrent variable decelerations, bradycardia; category 2 (indeterminate) FHR tracing does not meet criteria for either category I or III [6].

#### Placental histology

We retrospectively evaluated also placental histology. The presence of maternal vascular malperfusion (MVM) and chorioamnionitis on the placental histologies was defined according to the Amsterdam International Consensus criteria [7], and examined under the conventional microscope after hematoxylin and eosin staining. The placental pathologic findings involving maternal decidual vessels, reflecting abnormal spiral artery remodeling, and villous parenchyma, reflecting abnormalities in oxygenation and flow dynamics in the intervillous space, are summarized by the term MVM of the placental bed. MVM was defined by both macroscopic and microscopical placental findings. Macroscopic features include placental hypoplasia (with a weight and/or a thin cord

below 10th centile per gestational age), infarction and retroplacental hemorrhage. Microscopic findings include abnormalities of villous development, divided into distal villous hypoplasia and accelerated villous maturation. In case of chorioamnionitis (CA), we described the staging and grading of inflammation formulated in the Amsterdam International Consensus criteria. Preacute chorioamnionitis (stage 0) is characterised by neutrophils in the space beneath the chorionic plate. Early chorioamnionitis (stage 1) is defined by neutrophils limited to the chorion (chorionitis). Intermediate (stage 2) is distinguished by neutrophils within the chorionic or amniotic mesoderm.

Advanced chorioamnionitis (stage 3) included inflammation of the chorioamniotic membranes with necrosis of amniotic epithelium or neutrophil necrosis. About grading we described severe if there were confluent polymorphonuclear leukocytes or with subchorionic

## FIGURES

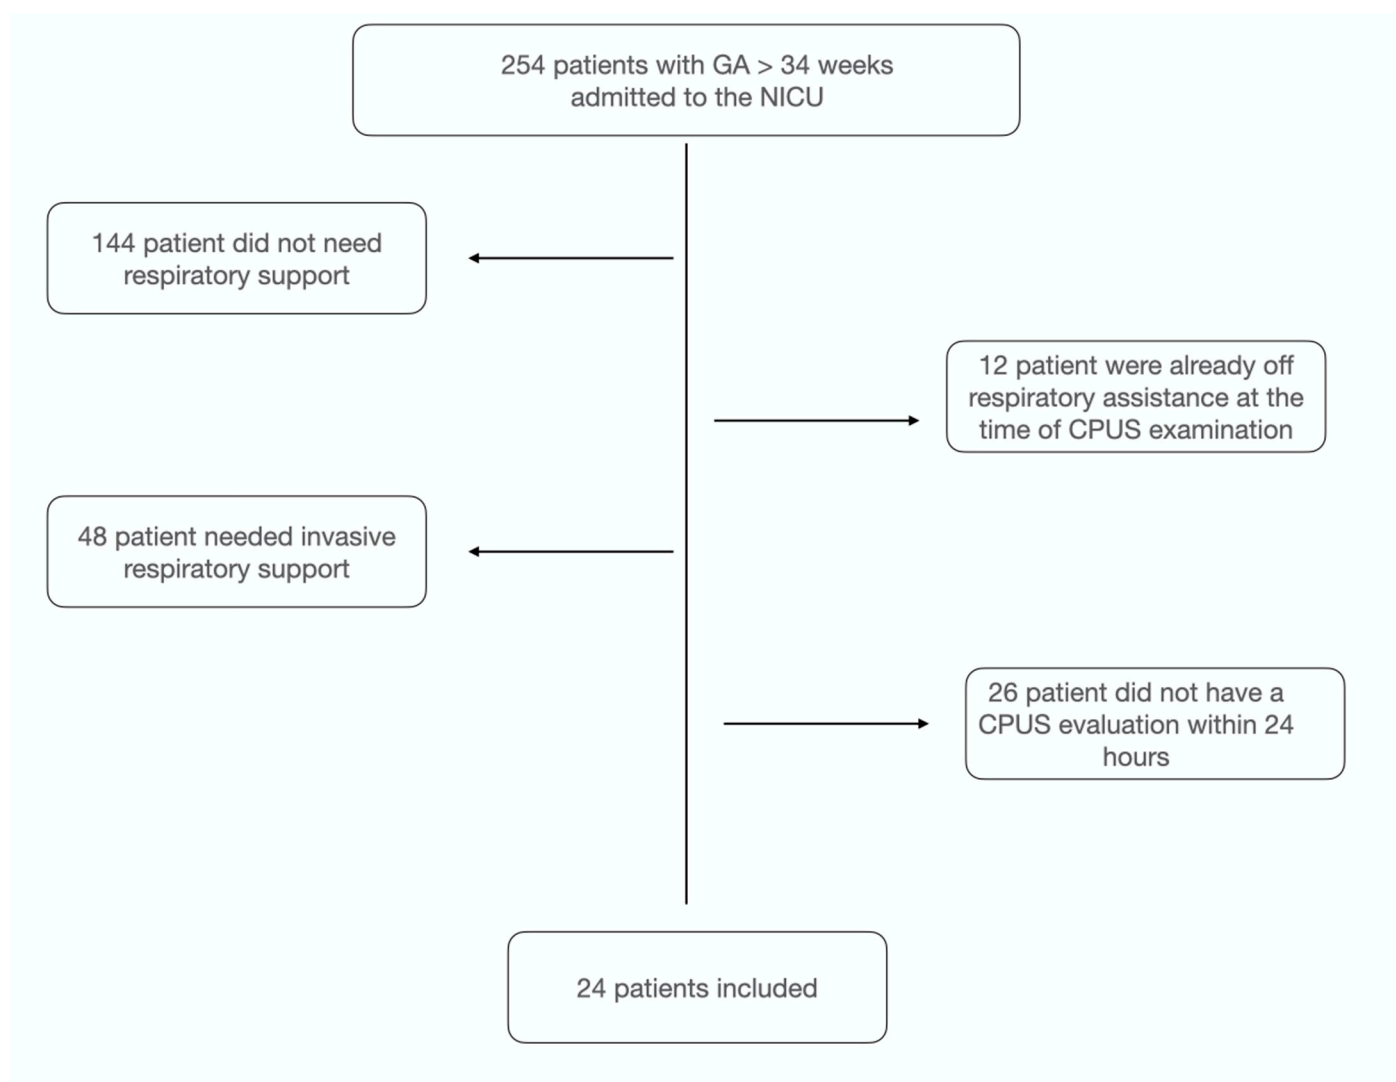

**Figure S1. Patient population flow chart**

Abbreviations: gestational age (GA), neonatal intensive care unit (NICU), cardiopulmonary ultrasound (CPUS)

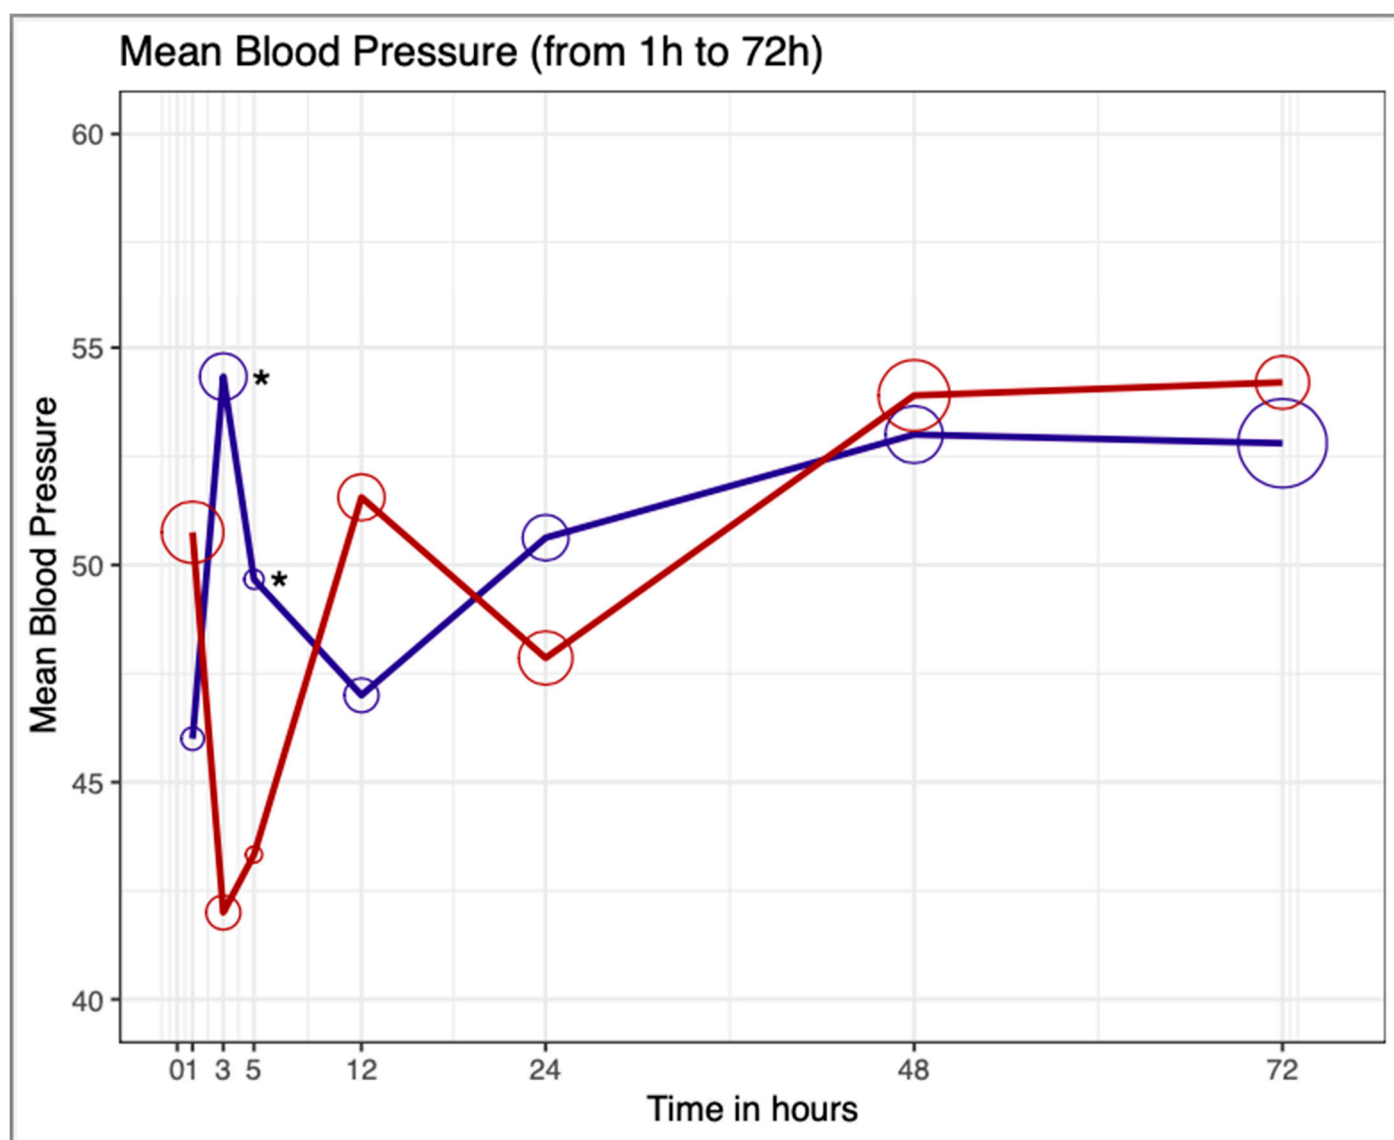

**Figure S2 Blood pressure trends.**

Blood pressure trends in infants with increased pulmonary vascular resistances (red line) and normal vascular resistances (blue line). Circles represent standard deviations

## TABLES

Table S1 - Characteristics of the Acute Respiratory Distress Phenotype Subgroups

| Characteristics                                       | Undefined<br>(AND-U)<br>(n=2) | Vascular<br>(AND-v)<br>(n=4) | Wet lung<br>(AND-w)<br>(n=4) | Vascular-<br>wet lung<br>(AND-<br>vw)<br>(n=4) | Vascular-<br>RDS<br>(n=2) | Consolidati<br>on (AND-p)<br>(n=6) | Vascular-<br>consolidat<br>ion (AND-<br>vc)<br>(n=2) | p-value |
|-------------------------------------------------------|-------------------------------|------------------------------|------------------------------|------------------------------------------------|---------------------------|------------------------------------|------------------------------------------------------|---------|
| Maternal diabetes, n (%)                              | 2 (100%)                      | 0                            | 1 (25%)                      | 1 (25%)                                        | 0                         | 0                                  | 0                                                    | 0.628   |
| Triple -I, n (%)                                      | 0                             | 1 (25%)                      | 3 (75%)                      | 1 (25%)                                        | 1 (50%)                   | 1 (16.7%)                          | 1 (50%)                                              | 0.466   |
| Placenta previa, n (%)                                | 0                             | 1 (25%)                      | 0                            | 0                                              | 0                         | 1 (16.7%)                          | 0                                                    | 0.802   |
| Fetal tachicardia, n (%)                              | 1 (50%)                       | 1 (25%)                      | 1 (33.3%)                    | 0                                              | 1 (50%)                   | 2 (33.3%)                          | 0                                                    | 0.990   |
| Maternal tachicardia, n (%)                           | 0                             | 0                            | 0                            | 0                                              | 0                         | 1 (16.7%)                          | 0                                                    | 0.909   |
| Maternal fever, n (%)                                 | 0                             | 1 (25%)                      | 0                            | 1 (25%)                                        | 0                         | 1 (16.7%)                          | 0                                                    | 0.925   |
| Intrapartum antibiotics, n (%)                        | 0                             | 1 (25%)                      | 2 (66.7%)                    | 2 (50%)                                        | 2 (100%)                  | 1 (16.7%)                          | 0                                                    | 0.241   |
| Chorioamnionitis                                      |                               |                              |                              |                                                |                           |                                    |                                                      | 0.478   |
| No, n (%)                                             | 1 (50%)                       | 2 (50%)                      | 3 (75%)                      | 1 (50%)                                        | 1 (50%)                   | 5 (83.3%)                          | 0                                                    |         |
| Histological, n (%)                                   | 1 (50%)                       | 1 (25%)                      | 1 (25%)                      | 1 (50%)                                        | 1 (50%)                   | 0                                  | 2 (100%)                                             |         |
| Clinic, n (%)                                         | 0                             | 1 (25%)                      | 0                            | 0                                              | 0                         | 1 (16.7%)                          | 0                                                    |         |
| Placenta malperfusion, n (%)                          | 1 (50%)                       | 3 (75%)                      | 1 (25%)                      | 1 (25%)                                        | 2 (100%)                  | 2 (33.3%)                          | 2 (100%)                                             | 0.264   |
| Gestational age (weeks),<br>median (IQR)              | 40.4 (39.7-<br>41.1)          | 41 (35.8-<br>41.8)           | 37.5 (36-<br>40.3)           | 36.8 (36-<br>40.3)                             | 38 (35.7-<br>39.3)        | 40.2 (39-41)                       | 40.3 (39-<br>41.6)                                   | 0.729   |
| Birth weight (grams),<br>median (IQR)                 | 3700 (3500-<br>3900)          | 3400 (2720-<br>3690)         | 3590 (3030-<br>4388)         | 2800<br>(2710-<br>3200)                        | 3200<br>(2100-<br>4300)   | 3400 (3080-<br>3540)               | 3500<br>(3200-<br>3800)                              | 0.453   |
| Need for any kind of<br>resuscitation at birth, n (%) | 1 (50%)                       | 3 (75%)                      | 0                            | 0                                              | 1 (50%)                   | 4 (66.7%)                          | 2 (100%)                                             | 0.072   |
| Apgar at 1 minute, median<br>(IQR)                    | 7.5 (6-9)                     | 5 (3.5-8)                    | 9 (9-9)                      | 9 (9-9)                                        | 6.5 (4-9)                 | 7 (5-9)                            | 5.5 (5-6)                                            | 0.153   |
| Apgar at 5 minutes,<br>median (IQR)                   | 9 (8-10)                      | 7.5 (6-9)                    | 10 (10-10)                   | 10 (10-10)                                     | 7.5 (5-10)                | 8 (7-9)                            | 7.5 (7-8)                                            | 0.061   |
| Amniotic fluid                                        |                               |                              |                              |                                                |                           |                                    |                                                      | 0.126   |
| Clear, n (%)                                          | 2 (100%)                      | 1 (25%)                      | 3 (100%)                     | 4 (100%)                                       | 1 (100%)                  | 1 (16.7%)                          | 0                                                    |         |
| Meconium stained, n (%)                               | 0                             | 3 (75%)                      | 0                            | 0                                              | 0                         | 4 (66.7%)                          | 2 (100%)                                             |         |
| Blood stained, n (%)                                  | 0                             | 0                            | 0                            | 0                                              | 0                         | 1 (16.7%)                          | 0                                                    |         |

|                                                       |                  |                  |                  |                  |                  |                  |                  |       |
|-------------------------------------------------------|------------------|------------------|------------------|------------------|------------------|------------------|------------------|-------|
| Maximum CRP (mg/dL) , median (IQR)                    | 0.9 (0.9-0.9)    | 3 (0.5-5.4)      | 5.2 (1.6-6.5)    | 2 (1.4-3.5)      | 18.5 (5-30)      | 1.2 (0-2)        | 3.4 (3.-3.8)     | 0.001 |
| Positive blood culture, n (%)                         | 0                | 0                | 0                | 0                | 1 (50%)          | 0                | 0                | 0.550 |
| Antibiotic therapy, n (%)                             | 0                | 3 (75%)          | 3 (75%)          | 0                | 2 (100%)         | 1 (16.7%)        | 1 (50%)          | 0.055 |
| Antibiotics duration (days), median (IQR)             | 0 (0-0)          | 3.5 (0.7-4)      | 3 (0.5-4.7)      | 0 (0-0)          | 8.5 (2-15)       | 0 (0-2)          | 1.5 (0-3)        |       |
| Length of stay (day), median (IQR)                    | 11.5 (5-18)      | 8 (6-12)         | 9 (7-11)         | 4 (3-5)          | 14.5 (11-18)     | 4 (3.5-8)        | 6.5 (6-7)        | 0.094 |
| Duration of CPAP (hours), median (IQR)                | 15 (0-30)        | 16 (0-60)        | 65 (13-78)       | 12 (0-60)        | 80 (58-102)      | 24 (8-32)        | 27 (5-49)        | 0.211 |
| Duration of HFNC (hours), median (IQR)                | 115 (0-230)      | 3 (0-56)         | 1.5 (0-41.2)     | 0 (0-36)         | 6.5 (1-12)       | 0 (0-21)         | 0 (0-0)          | 0.266 |
| Duration of NRS/low-flow oxygen (hours), median (IQR) | 133 (30-236)     | 54 (8-92)        | 70 (55-84)       | 38 (25-66)       | 96.5 (88-105)    | 15.5 (4-59)      | 27 (5-49)        | 0.207 |
| Maximum FiO2, median (IQR)                            | 0.35 (0.30-0.40) | 0.30 (0.30-0.38) | 0.40 (0.26-0.55) | 0.25 (0.30-0.35) | 0.50 (0.50-0.50) | 0.30 (0.26-0.45) | 0.40 (0.40-0.40) | 0.752 |
| Surfactant administration via INSURE, n (%)           | 0                | 1 (25%)          | 1 (25%)          | 0                | 1 (50%)          | 1 (16.7%)        | 0                | 0.731 |
| Hours of life at CPUS, median (IQR)                   | 18 (10-22)       | 18 (10-21)       | 14 (6-22)        | 9 (5-19)         | 23.5 (23-24)     | 15 (5-26)        | 13 (2-24)        | 0.692 |
| FiO2 at CPUS, median (IQR)                            | 0.33 (0.27-0.39) | 0.28 (0.28-0.38) | 0.35 (0.24-0.50) | 0.25 (0.30-0.35) | 0.45 (0.40-0.50) | 0.30 (0.24-0.40) | 0.38 (0.36-0.40) | 0.354 |

*Abbreviations:* Intrauterine growth restriction (IUGR), non invasive respiratory support (NRS), continuous positive airway pressure (CPAP), high flow nasal cannula (HFNC), C-reactive protein (CRP)

Table S2 - Characteristics of the **Vascular/not Vascular** Phenotype Subgroups

| Characteristics                                    | Normal PVR (n=12) | Increased PVR (n=12) | p-value |
|----------------------------------------------------|-------------------|----------------------|---------|
| Maternal diabetes, n (%)                           | 1 (8.3%)          | 1 (8.3%)             | 1       |
| Triple I, n (%)                                    | 4 (33.3%)         | 4 (33.3%)            | 1       |
| Fetal tachicardia, n (%)                           | 4 (36.4%)         | 2 (16.7%)            | 0.549   |
| Maternal tachicardia, n (%)                        | 1 (11.1%)         | 0                    | 1       |
| Maternal fever, n (%)                              | 1 (10%)           | 2 (18.2%)            | 1       |
| Intrapartum antibiotics, n (%)                     | 3 (30%)           | 5 (41.7%)            | 0.903   |
| Chorioamnionitis                                   |                   |                      | 0.140   |
| No, n (%)                                          | 9 (75%)           | 4 (33.3%)            |         |
| Histology, n (%)                                   | 2 (16.7%)         | 6 (55.6%)            |         |
| Clinic, n (%)                                      | 1 (8.3%)          | 2 (11.1%)            |         |
| Placenta malperfusion, n (%)                       | 4 (33.3%)         | 8 (66.7%)            | 0.071   |
| Gestational age (weeks), median (IQR)              | 40 (37.2-41)      | 39.5 (35.8-42.5)     | 0.932   |
| Birth weight (grams), median (IQR)                 | 3480 (3300-3740)  | 3230 (2700-3700)     | 0.160   |
| Need for any kind of resuscitation at birth, n (%) | 5 (41.7%)         | 6 (50%)              | 1       |
| Apgar at 1 minute, median (IQR)                    | 9 (6.2-9)         | 6 (5-9)              | 0.347   |
| Apgar at 5 minutes, median (IQR)                   | 9.5 (8-10)        | 8 (7-10)             | 0.347   |
| Amniotic fluid                                     |                   |                      | 0.574   |
| Clear, n (%)                                       | 6 (54.4%)         | 6 (50%)              |         |
| Meconium stained, n (%)                            | 5 (36.4%)         | 6 (50%)              |         |
| Blood stained, n (%)                               | 1 (9.1%)          | 0                    |         |
| Maximum CRP (mg/dL), median [IQR]                  | 1.8 (0.7-5)       | 2.8 (1.4-4.7)        | 0.264   |
| Positive blood culture, n (%)                      | 0                 | 1 (16.7%)            | 1       |
| Antibiotic therapy, n (%)                          | 4 (33.3%)         | 6 (50%)              | 0.679   |
| Antibiotics duration (days), median (IQR)          | 0 (0-3.5)         | 1 (0-3.8)            | 0.59    |
| Length of stay (days), median (IQR)                | 7 (4-11)          | 6 (6-11)             | 0.746   |
| Duration of CPAP (hours), mean (IQR)               | 28.5 (3-51)       | 28 (0-67)            | 0.775   |



|                                                       |                  |                  |       |
|-------------------------------------------------------|------------------|------------------|-------|
| Duration of HFNC (hours), mean (IQR)                  | 0 (0-41)         | 0 (0-10.5)       | 0.367 |
| Duration of NRS/low-flow oxygen (hours), median (IQR) | 48 (13-85)       | 49 (25-85)       | 0.692 |
| Maximum FiO <sub>2</sub> , median (IQR)               | 0.35 (0.29-0.40) | 0.35 (0.30-0.40) | 0.875 |
| Surfactant administration via INSURE, n (%)           | 2 (16.7%)        | 2 (16.7%)        | 1     |
| Hours of life at CPUS, median (IQR)                   | 15 (7.2-23.5)    | 18 (6.2-22.5)    | 0.977 |
| FiO <sub>2</sub> at CPUS, median (IQR)                | 0.33 (0.28-0.40) | 0.34 (0.28-0.38) | 0.833 |

---

*Abbreviations:* Intrauterine growth restriction (IUGR), non invasive respiratory support (NRS), continuous positive airway pressure (CPAP), high flow nasal cannula (HFNC), C-reactive protein (CRP)

Table S3 - Characteristics of the lung phenotype groups

| Characteristics                                       | Normal<br>n=6    | Wet lung<br>n=8  | RDS<br>n=2       | Consolidation<br>n=8 | p-value |
|-------------------------------------------------------|------------------|------------------|------------------|----------------------|---------|
| Maternal diabetes, n (%)                              | 0                | 0                | 2 (28.6%)        | 0                    | 0.23    |
| Triple I, n (%)                                       | 1 (16.7%)        | 4 (100%)*        | 1 (14.3%)*       | 2 (28.6%)            | 0.03    |
| Placenta previa, n (%)                                | 1 (16.7%)        | 0                | 0                | 1 (14.3%)            | 1       |
| Fetal tachicardia, n (%)                              | 2 (33.3%)        | 1 (25%)          | 1 (14.3%)        | 2 (28.6%)            | 0.92    |
| Maternal tachicardia, n (%)                           | 0                | 0                | 0                | 1 (14.3%)            | 1       |
| Maternal fever, n (%)                                 | 1 (16.7%)        | 1 (25%)          | 0                | 1 (14.3%)            | 0.33    |
| Intrapartum antibiotics, n (%)                        | 3 (50%)          | 3 (75%)          | 2 (28.6%)        | 2 (28.6%)            | 0.45    |
| Chorioamnionitis                                      |                  |                  |                  |                      |         |
| No, n (%)                                             | 3 (50%)          | 4 (50%)          | 1 (50%)          | 4 (57.1%)            | 1       |
| Histology, n (%)                                      | 2 (33.3%)        | 4 (50%)          | 1 (50%)          | 3 (28.6%)            |         |
| Clinic, n (%)                                         | 1 (16.7%)        | 0                | 0                | 1 (14.3%)            |         |
| Placenta malperfusion, n (%)                          | 4 (66.7%)        | 2 (50%)          | 2 (28.6%)        | 4 (57.1%)            | 0.63    |
| Gestational age (weeks), median (IQR)                 | 40.7 (38.3-41)   | 37.5 (36-2-40.3) | 37.6 (36-41)     | 40 (39-41)           | 0.524   |
| Birth weight (grams), median (IQR)                    | 3510 (3097-3787) | 3590 (2860-4388) | 2900 (2790-3550) | 3380 (3170-3500)     | 0.654   |
| Need for any kind of resuscitation at birth, n (%)    | 4 (66.7%)        | 0§               | 1 (14.3%)*       | 6 (75%)*§            | 0.01    |
| Apgar at 1 minute, median (IQR)                       | 5.5 (4.5-9)      | 9 (9-9)          | 9 (9-9)          | 6 (5-7)              | 0.058   |
| Apgar at 5 minutes, median (IQR)                      | 8 (6,7-9.2)*     | 10 (10-10)*†     | 10 (10-10)§      | 8 (7-8)†§            | 0.017   |
| Amniotic fluid                                        |                  |                  |                  |                      |         |
| Clear, n (%)                                          | 3 (50%)          | 4 (100%)§        | 7 (100%)*§       | 0*                   | 0.001   |
| Meconium stained, n (%)                               | 3 (50%)          | 0                | 0*               | 6 (85.7)*            |         |
| Blood stained, n (%)                                  | 0                | 0                | 0                | 1 (14.3%)            |         |
| Maximum CRP (mg/dL), median (IQR)                     | 1.5 (0.5-5)      | 5.2 (3.6-6.5)    | 1.7 (0.6-10)     | 1.92 (0.9-3)         | 0.722   |
| Positive blood culture, n (%)                         | 0                | 0                | 1 (50%)          | 0                    | 0.813   |
| Antibiotic therapy, n (%)                             | 3 (50%)          | 3 (37%)          | 2 (100%)         | 2 (25%)              | 0.633   |
| Antibiotics duration (days), median (IQR)             | 1.5 (0-4)        | 3 (0.5-4.7)      | 0 (0-2)          | 0 (0-3)              | 0.929   |
| Length of stay (days), median (IQR)                   | 8 (5.7-14.2)     | 8 (6.2-9.8)      | 7 (3.5-14)       | 4 (4-7)              | 0.415   |
| Duration of CPAP (hours), median (IQR)                | 15 (0-41)        | 38 (0-78)        | 54 (0-72)        | 28 (11-41)           | 0.574   |
| Duration of HFNC (hours), median (IQR)                | 3 (0-112)        | 1.5 (0-41.2)     | 0 (0-12)         | 0 (0-0)              | 0.440   |
| Duration of NRS/low-flow oxygen (hours), median (IQR) | 54 (22.5-132)    | 70 (35-84)       | 54 (24-88)       | 20 (5-50)            | 0.506   |
| Maximum FiO <sub>2</sub> , median (IQR)               | 0.30 (0.30-0.40) | 0.40 (0.32-0.55) | 0.30 (0.21-0.50) | 0.40 (0.30-0.40)     | 0.526   |
| Surfactant administration via INSURE, n (%)           | 1 (16.7%)        | 1 (12.5%)        | 1 (50%)          | 1 (12.5%)            | 1       |
| Hours of life at CPUS, median (IQR)                   | 18 (10-22)       | 14 (7-22)        | 20 (5-24)        | 3 (13-24)            | 0.798   |
| FiO <sub>2</sub> at CPUS, median (IQR)                | 0.28 (0.27-0.36) | 0.35 (0.32-0.50) | 0.30 (0.21-0.45) | 0.35 (0.38-0.40)     | 0.523   |

*Abbreviations:* Intrauterine growth restriction (IUGR), non invasive respiratory support (NRS), continuous positive airway pressure (CPAP), high flow nasal cannula (HFNC), C-reactive protein (CRP). \*§: symbols represent significance among groups. Two groups with the same symbol are significant among each other

## References

1. Walker, J. D. NICE guidance on diabetes in pregnancy: management of diabetes and its complications from preconception to the postnatal period. NICE clinical guideline 63. London, March 2008. *Diabet Med* 2008, 25 (9), 1025-7. DOI: 10.1111/j.1464-5491.2008.02532.x .
2. 2. Classification and Diagnosis of Diabetes: Standards of Medical Care in Diabetes-2020. *Diabetes Care* 2020, 43 (Suppl 1), S14-s31. DOI: 10.2337/dc20-S002 .
3. Gestational Hypertension and Preeclampsia: ACOG Practice Bulletin, Number 222. *Obstet Gynecol* 2020, 135 (6), e237-e260. DOI: 10.1097/aog.0000000000003891 .
4. Peng, C. C.; Chang, J. H.; Lin, H. Y.; Cheng, P. J.; Su, B. H. Intrauterine inflammation, infection, or both (Triple I): A new concept for chorioamnionitis. *Pediatr Neonatol* 2018, 59 (3), 231-237. DOI: 10.1016/j.pedneo.2017.09.001 .
5. Ott, W. J. Sonographic diagnosis of fetal growth restriction. *Clin Obstet Gynecol* 2006, 49 (2), 295-307. DOI: 10.1097/00003081-200606000-00011 .
6. Macones, G. A.; Hankins, G. D.; Spong, C. Y.; Hauth, J.; Moore, T. The 2008 National Institute of Child Health and Human Development workshop report on electronic fetal monitoring: update on definitions, interpretation, and research guidelines. *Obstet Gynecol* 2008, 112 (3), 661-6. DOI: 10.1097/AOG.0b013e3181841395 .
7. Khong, T. Y.; Mooney, E. E.; Ariel, I.; Balmus, N. C.; Boyd, T. K.; Brundler, M. A.; Derricott, H.; Evans, M. J.; Faye-Petersen, O. M.; Gillan, J. E.; Heazell, A. E.; Heller, D. S.; Jacques, S. M.; Keating, S.; Kelehan, P.; Maes, A.; McKay, E. M.; Morgan, T. K.; Nikkels, P. G.; Parks, W. T.; Redline, R. W.; Scheimberg, I.; Schoots, M. H.; Sebire, N. J.; Timmer, A.; Turowski, G.; van der Voorn, J. P.; van Lijnschoten, I.; Gordijn, S. J. Sampling and Definitions of Placental Lesions: Amsterdam Placental Workshop Group Consensus Statement. *Arch Pathol Lab Med* 2016, 140 (7), 698-713. DOI: 10.5858/arpa.2015-0225-CC .
